# Supplementary material for: Acoustic Divergence with Gene Flow in a Lekking Hummingbird with Complex Songs
Source: PLoS One. 2014 Oct 1;9(10):e109241. doi: 10.1371/journal.pone.0109241 (PMC4182805; doi:10.1371/journal.pone.0109241)
Supplement: Table S2 — Mean ± SD of spectral and temporal measurements of introductory syllables across leks of wedge-tailed sabrewings. N = number of individuals, n = number of songs. (DOC) [file pone.0109241.s003.doc]

**Table S2. Syllables and mean  SD of spectral and temporal measurements of introductory syllables across leks of wedge-tailed sabrewings.**

|  |  |  |  |  |  |  |  |  |  |  |
| --- | --- | --- | --- | --- | --- | --- | --- | --- | --- | --- |
| **Lek** | **N** | **n** | **No. different syllables** | **No. exclusive syllables** | **Duration (s)** | **Min. frequency (kHz)** | **Bandwidth (kHz)** | **Peak Frequency (kHz)** | **No. elements** | **No. different elements** |
| 1. Ciel | 13 | 143 | 89 | 42 | 0.4  0.12 | 2.97  0.5 | 2.19  0.87 | 4.09  0.35 | 3.85  1.57 | 1.61  1.04 |
| 2. GF | 5 | 25 | 41 | 17 | 0.305  0.04 | 4.43  0.19 | 2.12  0.22 | 5.51  1.12 | 1  0 | 1  0 |
| 3. Nar | 4 | 17 | 51 | 18 | 0.55  0.07 | 3.15  0.34 | 3.2  0.5 | 4.31  0.09 | 7  1.09 | 2  0 |
| 4. Aqm | 5 | 21 | 58 | 23 | 0.74  0.23 | 2.66  0.53 | 3.1  0.54 | 3.77  0.5 | 6.6  1.35 | 2  0 |
| 5. Xil | 7 | 33 | 50 | 21 | 0.73  0.15 | 2.81  0.49 | 3.25  0.69 | 4.12  0.32 | 9.28  1.98 | 2.86  0.38 |
| 6. Cuet | 3 | 27 | 33 | 12 | 0.76  0.3 | 3.28  0.46 | 2.51  0.62 | 3.96  0 | 5.67  0.58 | 2.67  0.58 |
| 7. Mac | 3 | 43 | 100 | 54 | 0.86  0.61 | 2.47  1.22 | 2.81  0.92 | 4.43  0.78 | 11.5  7.23 | 1.75  0.5 |
| 8. Ord | 10 | 149 | 30 | 14 | 0.54  0.19 | 2.73  0.6 | 2.78  1.1 | 4.24  0.21 | 5.75  2.41 | 2.12  0.34 |
| 9. UG | 6 | 42 | 41 | 10 | 0.55  0.09 | 3.23  0.48 | 2.1  0.58 | 4.11  0.46 | 4.6  0.84 | 2.2  0.42 |

N = number of individuals, n = number of songs.
